# Supplementary material for: The Provenance of Slovenian Milk Using 87Sr/86Sr Isotope Ratios
Source: MDPI journal article supplement (doi:10.3390/foods10081729), 2021-07-27
Supplement: s1 [file s1]

# Supplementary Materials

## The provenance of Slovenian milk using $^{87}\text{Sr}/^{86}\text{Sr}$ isotope ratios

Staša Hamzić Gregorčič<sup>1,2</sup>, Nives Ogrinc<sup>1,2</sup>, Russell Frew<sup>3</sup>, Marijan Nečemer<sup>2</sup>, Janja Vrzel<sup>4</sup>, Lidija Strojnik<sup>1,2</sup> and Tea Zuliani<sup>1,2,\*</sup>

<sup>1</sup> Department of Environmental Sciences, Jožef Stefan Institute, Jamova 39, Ljubljana, Slovenia; [stasa.gregorcic@ijs.si](mailto:stasa.gregorcic@ijs.si) (S.H.G.); [nives.ogrinc@ijs.si](mailto:nives.ogrinc@ijs.si) (N.O.); [lidija.strojnik@ijs.si](mailto:lidija.strojnik@ijs.si) (L.S.); [tea.zuliani@ijs.si](mailto:tea.zuliani@ijs.si) (T.Z.)

<sup>2</sup> Jožef Stefan International Postgraduate School, Jamova 39, Ljubljana, Slovenia; S.H.G.; N.O.; [marijan.necemer@ijs.si](mailto:marijan.necemer@ijs.si) (M.N.); L.S.; T.Z.

<sup>3</sup> Department of Chemistry, University of Otago, PO Box 56, Dunedin, New Zealand

<sup>4</sup> JR-AquaConSol GmbH, Graz, Austria

\* Correspondence: [tea.zuliani@ijs.si](mailto:tea.zuliani@ijs.si); Tel.: +386 1 477 3542

This supplement material describes the optimisation and validation of an analytical method for  $^{87}\text{Sr}/^{86}\text{Sr}$  isotope ratio determination in milk. The protocol includes: reagents and standard solutions, sample pre-treatment, decomposition of the sample matrix, Sr-matrix separation and method validation.

### 1. Reagents and standard solutions

Hydrochloric acid (30% (w/w) HCl, Suprapur) and hydrogen peroxide (30% (w/w) H<sub>2</sub>O<sub>2</sub>) were obtained from Merck Ltd. (Darmstadt, Germany). Nitric acid (68-70% (w/w) HNO<sub>3</sub>, Suprapure) was obtained from Carlo Erba Reagents Srl (Milan, Italy). For elemental screening, the standard solutions containing Sr and Rb were prepared by dilution of the single-element ICP standards (1000 mg/L, Certipur, Merck, Darmstadt, Germany). Rhodium (Rh), as an internal standard, was prepared by dilution of the single-element ICP standard (1000 mg/L, Certipur, Merck, Darmstadt, Germany). SPS-SW1 Surface-water-trace elements, was obtained from Spectrapure Standards (Oslo, Norway). Ultrapure water with a resistivity of 18.2 MΩ cm was obtained from a Milli-Q Element System (Merck Millipore, Watertown, MA, USA) and used throughout this work for the preparation of standard solutions and diluting concentrated acids and samples. For separation of Sr from the sample matrix, Sr-selective resin (100-150 μm, TrisKem International, Bruz, France) was used. For the quality control of the pre-treatment techniques, namely the total Sr and Rb concentrations, CRMs NIST RM 8435 (whole milk powder; National Institute of Standards and Technology, Gaithersburg, USA) with declared fat content 21.3% and IAEA-153 (milk powder; International Atomic Energy Agency, Vienna Austria) were used. The fat content of IAEA-153 is not declared. This reference material was analysed for interlaboratory comparison to validate the optimised method and determine its  $^{87}\text{Sr}/^{86}\text{Sr}$  isotope ratio value.

### 2. Sample pre-treatment

As no matrix certified reference material (CRM) for Sr isotope analysis exists, the preliminary experiments were carried out using a sample of whole milk powder labelled PM (whole milk powder, 26% fat content, Pomurske Mlekarne, Murska Sobota) that was purchased on the local market in Slovenia.

Before the sample pre-treatment step, all glass and plastic wares were soaked in 10% (v/v) analytical grade HNO<sub>3</sub> overnight, rinsed with Milli-Q water and dried in the oven. Samples were pretreated using microwave-assisted acid digestion system UltraWAVE (Single Reaction Chamber Microwave Digestion System; Milestone, Soristone, Italy). Freeze-dried and homogenised milk sample (0.30 g) was weighed into Teflon (PTFE) tube, and 6 ml of concentrated HNO<sub>3</sub> was added. The tubes

were closed and subjected to microwave digestion. Samples were pretreated using the program, as shown in Table S1. Further, the resulting solutions were quantitatively transferred into 30 ml polyethylene (PE) graduated vials and filled up to 15 ml with Milli-Q water. Samples were stored at 4 °C until further processing. After each mineralisation cycle, a cleaning cycle was performed with 6 ml of diluted HNO<sub>3</sub> (1:1, v/v) to eliminate cross-contamination.

**Table S1.** Microwave-assisted acid digestion program used for pre-treatment of milk sample.

| Step | Time     | Ramp °C/min | T final | Hold time | Power  |
|------|----------|-------------|---------|-----------|--------|
| 1    | 00:20:00 | 11°C/min    | 240°C   | 30 min    | 1500 W |

After mineralisation, sample solutions were evaporated to near dryness on a sand bath at  $T \leq 90^{\circ}\text{C}$  (IKA-C-MAG HP 10, IKA-Werke GmbH & Co., Staufen im Breisgau, Germany). Residual sample materials were redissolved in concentrated HNO<sub>3</sub> and H<sub>2</sub>O<sub>2</sub> to destroy any residual organic matter. If organic matter was still present, the evaporation of sample was repeated until the complete destruction of the organic matter. Samples were then dissolved in 8M HNO<sub>3</sub> for subsequent Sr/matrix separation. The Sr selective resin (0.30 g) was weighed directly into 2 ml columns. The columns were rinsed with Milli-Q water, activated with 6M HCl and preconditioned with 8M HNO<sub>3</sub>. Measurements of Sr and Rb concentrations in mineralised milk samples and the Sr fraction were performed by ICP-MS (7900x, Agilent Technologies Inc., Tokyo, Japan) to follow the mass balance. For the quality control of the measurements, SPS-SW1 was analysed at the beginning and end of each analytical sequence. Good agreement between certified and determine Rb and Sr concentrations were obtained.

### 3. Decomposition of the sample matrix

The method was optimised in terms of completeness of mineralisation, chemical recovery of Sr isolated from the sample matrix, minimal contamination, and turnaround time. The blanks of analyte-free media were prepared using the same materials and reagents as for the samples. To monitor the percentage recovery of target analytes and the effectiveness of matrix destruction, total concentrations of Sr were measured by ICP-MS after sample pre-treatment and after the Sr separation procedure (Table S2). The non-digested residual organic matter can strongly affect Sr/Rb separation efficiency on the column. Thus, Sr recovery after Sr/matrix separation step gives us information about the effectiveness of the matrix destruction. The experiments were carried out on a sample of whole milk powder (PM – Pomurske mlekarne), which was previously analysed, and its Sr concentration was estimated to be  $2.90 \pm 0.08$  mg/kg.

The method was optimised based on the recovery of Sr after the Sr/matrix separation using varying sample size (0.30 and 0.70 g) and acid digestion volumes (4 and 6 ml) and acid mixtures (HNO<sub>3</sub> and/or a mixture of HNO<sub>3</sub> and H<sub>2</sub>O<sub>2</sub>) (Table S2).

**Table S2.** Comparison of the Sr concentrations obtained after microwave digestion of freeze-dried milk samples (mean  $\pm$  standard deviation; n = 3).

| Sample weight [g] | Reagents                                                   | Sr concentration after pretreatment [mg/kg] | Sr concentration after Sr-matrix separation [mg/kg] | Sr recovery [%] |
|-------------------|------------------------------------------------------------|---------------------------------------------|-----------------------------------------------------|-----------------|
| 0.70              | 4 ml HNO <sub>3</sub>                                      | $2.88 \pm 0.08$                             | $2.10 \pm 0.78$                                     | $72.5 \pm 7.2$  |
| 0.70              | 6 ml HNO <sub>3</sub>                                      | $2.90 \pm 0.10$                             | $2.27 \pm 0.66$                                     | $78.5 \pm 10.0$ |
| 0.70              | 5 ml HNO <sub>3</sub> + 1 ml H <sub>2</sub> O <sub>2</sub> | $2.89 \pm 0.08$                             | $2.04 \pm 0.49$                                     | $70.7 \pm 0.8$  |
| 0.30              | 4 ml HNO <sub>3</sub> + 2 ml H <sub>2</sub> O <sub>2</sub> | $2.94 \pm 0.13$                             | $2.59 \pm 0.23$                                     | $88.6 \pm 6.7$  |
| 0.30              | 6 ml HNO <sub>3</sub>                                      | $2.98 \pm 0.07$                             | $2.91 \pm 0.28$                                     | $97.9 \pm 1.6$  |

Given the results of the microwave method, all tested samples and reagents quantities gave similar Sr concentrations. Therefore, it can be concluded that total Sr recovery from the sample was obtained. As for accurate isotope determination, 100% recovery is desirable to avoid possible isotope fractionation, and the method with the highest recovery was selected. Low Sr recoveries after the separation (~75%) were found for the sample size of 0.70 g, most probably due to the presence of larger quantities of residual organic matter. Based on this observation, the optimal sample size to digest was

found to be 0.30 g with 6 ml HNO<sub>3</sub>, which achieved high Sr recovery (~98%) and was used for further analysis.

To evaluate the accuracy and precision of pre-treatment techniques, NIST SRM 8435 and IAEA-153 were analysed for Sr concentration. The results found for the CRMs were compared with their corresponding certified values and are reported in Table S3. At a 95% confidence level, good agreement with the certified values was found in all cases (Student's *t*-test, *p* < 0.05). The relative standard deviation (RSD) for three replicates of each standard ranges from 0.55 to 1.92%. The Sr concentrations in method blanks from three independent analyses were 0.0026 ± 0.0006 mg/kg.

**Table S3.** Determined Sr concentrations after pre-treatment in certified reference materials, NIST SRM 8435 and IAEA-153 (mean ± standard deviation; n = 3).

| CRM       | Sample weight [g] | Pretreatment method | Certified Sr [mg/kg]     | Determined Sr [mg/kg] | Sr recovery [%] |
|-----------|-------------------|---------------------|--------------------------|-----------------------|-----------------|
| NIST 8435 | 0.30              | microwave           | 4.35 ± 0.50              | 4.12 ± 0.26           | 94.6 ± 6.0      |
| IAEA-153  | 0.30              | microwave           | 4.09 ± 0.34 <sup>a</sup> | 3.99 ± 0.05           | 97.3 ± 1.8      |

<sup>a</sup> Values are informative according to the certificate (based on dry weight).

#### 4. Sr-matrix separation

Regarding the Sr and Rb content in milk samples, optimising the procedure for efficient Sr loading and Rb removal has been performed. Before the loading of the sample onto the Sr selective resin, pretreated samples were evaporated to near dryness and redissolved in 1 ml of 8M HNO<sub>3</sub> to obtain concentrations ranging between 300 – 700 ng Sr/ml before being loaded onto the column and 30 – 70 ng Sr/ml after the column, which is the optimal concentration range for Sr isotope ratio determination by MC-ICP-MS.

Strontium is strongly retained on the Sr resin with the increasing HNO<sub>3</sub> concentration of the sample and eluting solution [25]. While 3M HNO<sub>3</sub> has been shown to adequately separate Sr from Rb during chromatographic extraction separation from biological, environmental, and nuclear waste samples [47], 8M HNO<sub>3</sub> was shown to maximise the separation of other matrix elements such as Ba and Ca [48,49]. As milk contains high concentrations of these elements, 8M HNO<sub>3</sub> was therefore selected. The samples were loaded on the resin in 8M HNO<sub>3</sub>, and the resin was rinsed with 8M HNO<sub>3</sub> to maximise the elution of Rb and other possible interferences. Given the high Rb/Sr ratio in milk samples, it was difficult to remove all Rb in a single separation step, as is the case with biological tissues [50] and geological materials [51]. Therefore, after the first separation, the solution was evaporated again to near dryness and redissolved in 1 ml of 8M HNO<sub>3</sub> and submitted for the second separation on a freshly prepared column. The Rb removal was monitored by measuring its concentration before and after the chromatographic extraction procedure by ICP-MS. For this experiment, five different freeze-dried milk samples with different Rb/Sr ratios were analysed. The results are presented in Table S4.

**Table S4.** The efficiency of Rb removal.

| Sample | Before separation Rb [ng/mL] | Rb/Sr ratio | After 1 <sup>st</sup> separation Rb [ng/mL] | After 2 <sup>nd</sup> separation Rb [ng/mL] |
|--------|------------------------------|-------------|---------------------------------------------|---------------------------------------------|
| Milk 1 | 2216                         | 8.1         | 0.103                                       | < 0.005                                     |
| Milk 2 | 1297                         | 4.1         | 0.042                                       | < 0.005                                     |
| Milk 3 | 8402                         | 28.0        | 0.278                                       | < 0.005                                     |
| Milk 4 | 5455                         | 17.9        | 0.115                                       | < 0.005                                     |
| Milk 5 | 4858                         | 16.1        | 0.257                                       | < 0.005                                     |

As far as the efficiency of the Sr elution from the resin is concerned, Sr can be eluted from the column with either Milli-Q water or diluted HNO<sub>3</sub>. In the present study, Milli-Q water [12,14,20] and

0.05M HNO<sub>3</sub> [11,52,53] were used to determine the appropriate eluent. Better Sr yield was achieved by using Milli-Q water.

With a smaller resin size (0.20 g), it is possible that a small amount of strontium was flushed away from the column, which resulted in lower recovery compared to 0.30 g resin. The lowest extraction efficiency was observed using 0.70 g resin, probably due to the inadequate quantity of mobile phase. The optimal size of the resin was found to be 0.30 g and was used in further experiments (Figure S1).

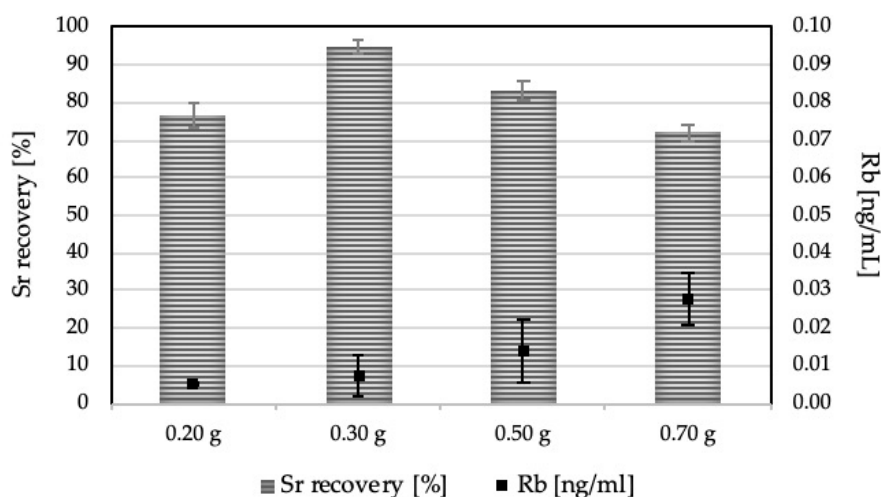

**Figure S1.** Extraction efficiency using different amounts of the Sr-Spec resin.

## 5. Method validation

Unfortunately, no matrix-matched certified reference materials are available for the <sup>87</sup>Sr/<sup>86</sup>Sr isotope ratio determination in milk. Consequently, the optimised method's repeatability, precision, and trueness were tested by analysis of the candidate reference material, IAEA-153.

Eight independent replicates were prepared in two days (4 each day). One sample from each day was measured three times. All measurements were carried out under optimised experimental parameters. Estimation of the measurement uncertainty for the Sr isotope ratio was done according to the guide to the expression of measurement uncertainty JCGM 100:28 and ISO GUM [54,55], applying the uncertainty propagation law without using second-order covariances. Combined uncertainty included contributions from the ion intensity measurements, mass bias corrections, and contributions from certified values of relevant ratios. The results are presented in Table S5 and were found to be comparable.

**Table S5.** <sup>87</sup>Sr/<sup>86</sup>Sr isotope ratios<sup>1</sup> for IAEA-153 milk sample.

| Laboratory | <sup>87</sup> Sr/ <sup>86</sup> Sr | Average | SD      |
|------------|------------------------------------|---------|---------|
| JSI        | 0.70831                            |         |         |
|            | 0.70838                            |         |         |
|            | 0.70819                            |         |         |
|            | 0.70825                            | 0.70829 | 0.00008 |
|            | 0.70835                            |         |         |
|            | 0.70823                            |         |         |
|            | 0.70828                            |         |         |
|            | 0.70824                            | 0.70828 | 0.00005 |
|            | 0.70829                            |         |         |
|            | 0.70824                            |         |         |

|                              |          |                |                |
|------------------------------|----------|----------------|----------------|
|                              | 0.70830  | 0.70828        | 0.00003        |
|                              | 0.70835  |                |                |
|                              | 0.70824  |                |                |
|                              | 0.70830  | 0.70829        | 0.00005        |
| <i>JSI value +/- U (k=2)</i> |          | <i>0.70828</i> | <i>0.00015</i> |
| UO                           | 0.708288 |                |                |
|                              | 0.708294 |                |                |
|                              | 0.708286 | 0.708289       | 0.000004       |

<sup>1</sup> Strontium isotope ratio determinations were carried at JSI out using a Nu II multi-collector ICP-MS instrument (Nu Instruments, Ametek Inc., UK) fitted to an Aridus IITM Desolvating Nebulizer System (Teledyne Cetac, Omaha, Nebraska, USA). At UO, determinations were conducted using a Nu Plasma HR MC-ICP-MS (Nu Instruments, Ametek Inc., UK) operating in low mass resolution mode coupled with a DSN-100 (Ametek, USA) desolvating sample introduction system.

The measurement uncertainty was larger than the standard deviations since the NIST 987 is the main contributor. The trueness was tested by comparing the <sup>87</sup>Sr/<sup>86</sup>Sr isotope ratio independently obtained from the Department of Chemistry at the University of Otago in New Zealand (UO). UO prepared and measured three independently prepared samples. Based on the results, it can be concluded that the optimised method described above is fit-for-purpose for the determination of the <sup>87</sup>Sr/<sup>86</sup>Sr isotope ratios of milk.

Table S6. The whole dataset of authentic milk sample analysis including the description of location, season and year of production, geological background, stable isotope ratio of oxygen ( $^{18}\text{O}/^{16}\text{O}$ ) in milk water and  $^{13}\text{C}/^{12}\text{C}$ ,  $^{15}\text{N}/^{14}\text{N}$  and  $^{34}\text{S}/^{32}\text{S}$  in casein, elemental analysis in the freeze dry samples determined with XRF.

| Basic data  |                    |          |           |        |      | XRF                                    |                                       |                                         |                                         |                                         |              |             |              |             |             |              |              |              |              |       |      |
|-------------|--------------------|----------|-----------|--------|------|----------------------------------------|---------------------------------------|-----------------------------------------|-----------------------------------------|-----------------------------------------|--------------|-------------|--------------|-------------|-------------|--------------|--------------|--------------|--------------|-------|------|
| Location ID | Location           | Latitude | Longitude | Season | Year | Geology                                | $\delta^{18}\text{O}_{\text{w}}$<br>‰ | $\delta^{13}\text{C}_{\text{cas}}$<br>‰ | $\delta^{15}\text{N}_{\text{cas}}$<br>‰ | $\delta^{34}\text{S}_{\text{cas}}$<br>‰ | Ca<br>(mg/g) | K<br>(mg/g) | Cl<br>(mg/g) | S<br>(mg/g) | P<br>(mg/g) | Zn<br>(mg/g) | Br<br>(mg/g) | Rb<br>(mg/g) | Sr<br>(mg/g) | Ca/Sr | K/Rb |
| C1          | Sežana             | 45.70862 | 13.87428  | summer | 2014 | Cretaceous: Carbonate Rocks and Flysch | -4.5                                  | -26.5                                   | 3.6                                     | 1.5                                     | 7.62         | 10.7        | 8.59         | 2.23        | 9.25        | 24.6         | 29.9         | 10.4         | 2.23         | 3.42  | 1.03 |
| C1          | Sežana             | 45.70862 | 13.87428  | winter | 2014 | Cretaceous: Carbonate Rocks and Flysch | -6.9                                  | -26.0                                   | 3.8                                     | 1.0                                     | 8.80         | 11.9        | 8.91         | 2.60        | 8.05        | 27.4         | 27.8         | 8.48         | 2.07         | 4.25  | 1.40 |
| C2          | Kozina             | 45.60928 | 13.93719  | summer | 2014 | Cretaceous: Carbonate Rocks and Flysch | -2.1                                  | -26.8                                   | 5.8                                     | 6.4                                     | 8.93         | 10.4        | 5.98         | 2.54        | 8.84        | 31.0         | 26.3         | 19.6         | 1.40         | 6.38  | 0.53 |
| C2          | Kozina             | 45.60928 | 13.93719  | winter | 2014 | Cretaceous: Carbonate Rocks and Flysch | -4.4                                  | -23.6                                   | 4.9                                     | 4.9                                     | 9.21         | 11.4        | 7.12         | 2.54        | 7.86        | 30.3         | 24.2         | 10.5         | 2.77         | 3.32  | 1.09 |
| C2          | Kozina             | 45.60928 | 13.93719  | winter | 2015 | Cretaceous: Carbonate Rocks and Flysch | -4.5                                  | -18.9                                   | 5.6                                     | 5.2                                     | n.d.         | n.d.        | n.d.         | n.d.        | n.d.        | n.d.         | n.d.         | n.d.         | n.d.         | n.d.  | n.d. |
| C3          | Brkini             | 45.55083 | 14.06222  | summer | 2014 | Cretaceous: Carbonate Rocks and Flysch | -5.2                                  | -23.7                                   | 4.6                                     | 5.1                                     | 6.86         | 8.96        | 5.42         | 2.04        | 9.25        | 28.2         | 19.6         | 14.4         | 1.46         | 4.70  | 0.62 |
| C3          | Brkini             | 45.55083 | 14.06222  | winter | 2014 | Cretaceous: Carbonate Rocks and Flysch | -7.0                                  | -26.1                                   | 5.2                                     | 5.9                                     | 8.80         | 12.5        | 6.90         | 2.45        | 8.18        | 22.5         | 24.6         | 28.3         | 0.94         | 9.38  | 0.44 |
| C3          | Brkini             | 45.55083 | 14.06222  | winter | 2015 | Cretaceous: Carbonate Rocks and Flysch | -6.1                                  | -22.2                                   | 5.5                                     | 7.2                                     | n.d.         | n.d.        | n.d.         | n.d.        | n.d.        | n.d.         | n.d.         | n.d.         | n.d.         | n.d.  | n.d. |
| C4          | Postojna           | 45.77504 | 14.21382  | summer | 2014 | Cretaceous: Carbonate Rocks and Flysch | -3.9                                  | -25.9                                   | 5.1                                     | 5.1                                     | n.d.         | n.d.        | n.d.         | n.d.        | n.d.        | n.d.         | n.d.         | n.d.         | n.d.         | n.d.  | n.d. |
| C4          | Postojna           | 45.77504 | 14.21382  | winter | 2014 | Cretaceous: Carbonate Rocks and Flysch | -6.3                                  | -20.5                                   | 5.8                                     | 4.3                                     | 7.46         | 8.8         | 7.07         | 2.51        | 8.06        | 28.1         | 17.1         | 25.1         | 1.12         | 6.66  | 0.35 |
| C4          | Postojna           | 45.77504 | 14.21382  | winter | 2015 | Cretaceous: Carbonate Rocks and Flysch | -6.1                                  | -24.4                                   | 5.3                                     | 3.6                                     | n.d.         | n.d.        | n.d.         | n.d.        | n.d.        | n.d.         | n.d.         | n.d.         | n.d.         | n.d.  | n.d. |
| C5          | Logatec            | 45.91761 | 14.23516  | summer | 2014 | Cretaceous: Carbonate Rocks and Flysch | -4.5                                  | -24.9                                   | 4.6                                     | 4.4                                     | 9.40         | 14.3        | 9.74         | 2.78        | 9.25        | 36.3         | 20.3         | 37.3         | 1.50         | 6.27  | 0.38 |
| C5          | Logatec            | 45.91761 | 14.23516  | winter | 2014 | Cretaceous: Carbonate Rocks and Flysch | -6.8                                  | -22.7                                   | 5.1                                     | 5.4                                     | 8.20         | 10.8        | 6.98         | 2.50        | 8.83        | 31.2         | 20.0         | 13.0         | 2.32         | 3.53  | 0.83 |
| C6          | Šmihel             | 45.95101 | 13.73780  | winter | 2014 | Cretaceous: Carbonate Rocks and Flysch | -6.8                                  | -24.3                                   | 5.8                                     | 4.4                                     | 7.98         | 9.69        | 6.71         | 2.72        | 8.67        | 29.9         | 13.2         | 13.2         | 2.40         | 3.33  | 0.73 |
| J1          | Bohinj             | 46.30065 | 13.94305  | summer | 2014 | Jurassic: Carbonate Rocks              | n.d.                                  | -24.1                                   | 3.8                                     | 5.0                                     | 7.79         | 10.2        | 7.42         | 2.24        | 7.95        | 27.5         | 13.9         | 27.0         | 1.39         | 5.60  | 0.38 |
| J1          | Bohinj             | 46.30065 | 13.94305  | winter | 2014 | Jurassic: Carbonate Rocks              | -7.1                                  | -24.3                                   | 3.9                                     | 4.5                                     | 7.55         | 10.4        | 7.26         | 2.23        | 7.04        | 28.4         | 15.2         | 17.1         | 0.95         | 7.94  | 0.61 |
| J2          | Žužemberk          | 45.83072 | 14.92945  | summer | 2014 | Jurassic: Carbonate Rocks              | -5.0                                  | -22.8                                   | 5.2                                     | 5.9                                     | 8.04         | 9.99        | 6.50         | 2.21        | 7.17        | 26.1         | 18.1         | 17.2         | 1.21         | 6.64  | 0.58 |
| J2          | Žužemberk          | 45.83072 | 14.92945  | winter | 2014 | Jurassic: Carbonate Rocks              | -6.9                                  | n.d.                                    | n.d.                                    | n.d.                                    | 8.83         | 11.1        | 7.41         | 2.74        | 8.41        | 32.4         | 16.8         | 16.7         | 1.32         | 6.69  | 0.66 |
| J2          | Žužemberk          | 45.83072 | 14.92945  | winter | 2015 | Jurassic: Carbonate Rocks              | -7.8                                  | -21.3                                   | 5.7                                     | 4.1                                     | n.d.         | n.d.        | n.d.         | n.d.        | n.d.        | n.d.         | n.d.         | n.d.         | n.d.         | n.d.  | n.d. |
| J3          | Podpeč             | 45.97324 | 14.41981  | summer | 2014 | Jurassic: Carbonate Rocks              | -5.4                                  | -20.2                                   | 5.1                                     | 5.3                                     | 8.22         | 9.53        | 6.19         | 2.47        | 7.63        | 32.1         | 12.7         | 12.5         | 3.03         | 2.71  | 0.76 |
| J3          | Podpeč             | 45.97324 | 14.41981  | winter | 2014 | Jurassic: Carbonate Rocks              | -6.4                                  | -19.6                                   | 5.2                                     | 5.4                                     | 9.79         | 11.5        | 7.06         | 2.93        | 9.41        | 37.7         | 12.0         | 10.0         | 1.56         | 6.28  | 1.15 |
| J4          | Kamenje            | 45.85574 | 15.15377  | summer | 2014 | Jurassic: Carbonate Rocks              | -5.5                                  | -21.1                                   | 6.0                                     | 4.8                                     | 7.38         | 10.7        | 7.13         | 2.35        | 6.57        | 29.4         | 17.2         | 16.7         | 1.23         | 6.00  | 0.64 |
| J4          | Kamenje            | 45.85574 | 15.15377  | winter | 2014 | Jurassic: Carbonate Rocks              | -7.2                                  | -19.5                                   | 5.4                                     | 4.9                                     | 7.85         | 10.5        | 6.88         | 2.49        | 8.09        | 30.2         | 24.2         | 16.0         | 2.15         | 3.65  | 0.66 |
| J5          | Vinica             | 45.46142 | 15.25357  | summer | 2014 | Jurassic: Carbonate Rocks              | -5.4                                  | -22.6                                   | 5.5                                     | 6.7                                     | 7.36         | 10.6        | 7.22         | 2.30        | 7.72        | 28.7         | 23.4         | 18.1         | 1.24         | 5.94  | 0.59 |
| J5          | Vinica             | 45.46142 | 15.25357  | winter | 2014 | Jurassic: Carbonate Rocks              | -6.9                                  | -20.0                                   | 5.4                                     | 4.7                                     | 8.14         | 9.70        | 5.80         | 2.51        | 8.72        | 34.0         | 9.73         | 12.7         | 3.26         | 2.50  | 0.76 |
| J6          | Šmarje pri Jelšah  | 45.97639 | 14.61882  | winter | 2014 | Jurassic: Carbonate Rocks              | -7.2                                  | -19.2                                   | 5.9                                     | 3.3                                     | 8.49         | 11.2        | 7.64         | 2.72        | 8.09        | 31.1         | 10.3         | 12.8         | 3.06         | 2.77  | 0.88 |
| N1          | Šentilj            | 46.68544 | 15.70966  | summer | 2014 | Neogene: Carbonate Rocks               | -5.5                                  | -24.0                                   | 6.6                                     | 4.8                                     | 7.84         | 9.45        | 6.39         | 2.56        | 8.00        | 24.6         | 11.7         | 14.4         | 2.96         | 2.65  | 0.66 |
| N1          | Šentilj            | 46.68544 | 15.70966  | winter | 2014 | Neogene: Carbonate Rocks               | -7.1                                  | -20.1                                   | 6.1                                     | 3.9                                     | 8.71         | 10.6        | 7.32         | 2.80        | 8.50        | 31.9         | 10.7         | 17.1         | 3.23         | 2.70  | 0.62 |
| N2          | Kamnik             | 46.22219 | 14.60712  | summer | 2014 | Neogene: Deposits                      | -5.3                                  | -22.4                                   | 5.8                                     | 4.2                                     | 6.93         | 9.79        | 6.43         | 2.05        | 6.44        | 21.3         | 12.6         | 10.9         | 1.90         | 3.65  | 0.90 |
| N2          | Kamnik             | 46.22219 | 14.60712  | winter | 2014 | Neogene: Deposits                      | -6.6                                  | -20.9                                   | 5.4                                     | 4.5                                     | 7.94         | 9.79        | 5.85         | 2.10        | 6.75        | 24.6         | 8.99         | 10.0         | 0.89         | 8.93  | 0.98 |
| N3          | Ponikva            | 46.25371 | 15.44393  | summer | 2014 | Neogene: Deposits                      | -5.4                                  | -22.9                                   | 6.0                                     | 3.3                                     | 7.63         | 9.99        | 6.63         | 2.31        | 7.69        | 28.3         | 9.43         | 16.0         | 2.57         | 2.97  | 0.62 |
| N3          | Ponikva            | 46.25371 | 15.44393  | winter | 2014 | Neogene: Deposits                      | -7.0                                  | -19.8                                   | 6.2                                     | 3.5                                     | 8.78         | 11.5        | 7.83         | 3.10        | 9.55        | 32.6         | 10.6         | 13.1         | 2.47         | 3.55  | 0.88 |
| N4          | Rogaška Slatina    | 46.23378 | 15.63860  | summer | 2014 | Neogene: Deposits                      | -5.3                                  | -22.7                                   | 5.9                                     | 2.9                                     | 8.34         | 11.2        | 7.17         | 2.55        | 8.24        | 33.6         | 9.93         | 14.9         | 2.50         | 3.34  | 0.75 |
| N4          | Rogaška Slatina    | 46.23378 | 15.63860  | winter | 2014 | Neogene: Deposits                      | -7.5                                  | -24.4                                   | 6.0                                     | 4.7                                     | 8.76         | 11.2        | 7.69         | 3.08        | 8.72        | 30.4         | 9.92         | 12.6         | 2.99         | 2.93  | 0.89 |
| T1          | Maribor            | 46.55463 | 15.64563  | summer | 2014 | Triassic: Carbonate Rocks              | -7.2                                  | -19.7                                   | 6.0                                     | 1.3                                     | 8.11         | 10.9        | 7.34         | 2.62        | 8.05        | 32.4         | 11.0         | 11.5         | 3.24         | 2.50  | 0.95 |
| T2          | Tolmin             | 46.18696 | 13.75652  | summer | 2014 | Triassic: Carbonate Rocks              | -3.2                                  | -25.7                                   | 3.4                                     | 4.7                                     | 10.1         | 12.9        | 9.05         | 2.76        | 7.30        | 27.9         | 15.7         | 20.9         | 1.65         | 6.12  | 0.62 |
| T2          | Tolmin             | 46.18696 | 13.75652  | winter | 2014 | Triassic: Carbonate Rocks              | -6.4                                  | -24.1                                   | 4.2                                     | 5.1                                     | 7.64         | 10.1        | 7.22         | 2.66        | 8.34        | 30.3         | 17.9         | 17.1         | 1.80         | 4.24  | 0.59 |
| T3          | Planina            | 46.04773 | 14.21534  | winter | 2014 | Triassic: Carbonate Rocks              | -7.3                                  | -20.5                                   | 5.7                                     | 3.5                                     | 7.31         | 9.83        | 6.82         | 2.15        | 7.20        | 31.0         | 19.7         | 14.1         | 1.36         | 5.38  | 0.70 |
| T3          | Planina            | 46.04773 | 14.21534  | winter | 2015 | Triassic: Carbonate Rocks              | -8.7                                  | -20.4                                   | 6.1                                     | 2.4                                     | n.d.         | n.d.        | n.d.         | n.d.        | n.d.        | n.d.         | n.d.         | n.d.         | n.d.         | n.d.  | n.d. |
| T4          | Velike Lašče       | 45.83366 | 14.63623  | summer | 2014 | Triassic: Carbonate Rocks              | -5.2                                  | -24.0                                   | 5.1                                     | 5.1                                     | 9.12         | 11.5        | 7.25         | 2.39        | 8.53        | 29.1         | 22.0         | 11.9         | 2.60         | 3.51  | 0.97 |
| T4          | Velike Lašče       | 45.83366 | 14.63623  | winter | 2014 | Triassic: Carbonate Rocks              | -7.2                                  | -22.6                                   | 4.8                                     | 5.5                                     | 8.50         | 9.80        | 6.32         | 2.54        | 8.24        | 30.1         | 19.3         | 13.2         | 1.49         | 5.70  | 0.74 |
| T5          | Vrhe               | 46.18810 | 15.01356  | summer | 2014 | Triassic: Carbonate Rocks              | -5.6                                  | -25.4                                   | 5.1                                     | 3.7                                     | 9.01         | 11.6        | 7.68         | 2.37        | 7.80        | 30.6         | 12.6         | 15.6         | 4.75         | 1.90  | 0.74 |
| T5          | Vrhe               | 46.18810 | 15.01356  | winter | 2014 | Triassic: Carbonate Rocks              | -7.3                                  | -22.5                                   | 5.6                                     | 2.3                                     | 8.63         | 11.6        | 7.82         | 2.66        | 9.72        | 27.5         | 11.8         | 17.1         | 3.54         | 2.44  | 0.68 |
| P1          | Šibnica na Pohorju | 46.53564 | 15.26751  | summer | 2014 | Paleogene: Deposits                    | -5.1                                  | -22.4                                   | 6.1                                     | 4.9                                     | 9.59         | 13.2        | 8.57         | 2.80        | 8.84        | 34.8         | 14.5         | 18.4         | 2.61         | 3.67  | 0.72 |
| P1          | Šibnica na Pohorju | 46.53564 | 15.26751  | winter | 2014 | Paleogene: Deposits                    | -7.2                                  | -20.3                                   | 6.2                                     | 4.7                                     | 8.10         | 10.8        | 7.25         | 2.54        | 7.78        | 29.6         | 9.27         | 16.7         | 1.63         | 4.97  | 0.65 |
| P2          | Vuzenica           | 46.59800 | 15.16536  | summer | 2014 | Paleogene: Deposits                    | -5.3                                  | -23.5                                   | 6.6                                     | 7.0                                     | 8.48         | 11.7        | 7.66         | 2.31        | 7.47        | 31.4         | 11.3         | 17.1         | 2.83         | 3.00  | 0.68 |
| P2          | Vuzenica           | 46.59800 | 15.16536  | winter | 2014 | Paleogene: Deposits                    | -7.2                                  | -21.0                                   | 6.1                                     | 5.3                                     | 9.00         | 11.3        | 7.99         | 3.04        | 9.04        | 30.2         | 9.44         | 14.7         | 2.59         | 3.47  | 0.77 |
| P3          | Vitanje            | 46.38151 | 15.29503  | summer | 2014 | Paleogene: Deposits                    | -5.0                                  | -23.4                                   | 5.8                                     | 4.0                                     | 8.51         | 10.6        | 6.88         | 2.36        | 7.80        | 28.7         | 11.3         | 17.4         | 2.16         | 3.94  | 0.61 |
| P3          | Vitanje            | 46.38151 | 15.29503  | winter | 2014 | Paleogene: Deposits                    | -7.0                                  | -21.0                                   | 6.3                                     | 3.1                                     | 9.11         | 11.1        | 8.06         | 3.27        | 9.66        | 28.5         | 13.6         | 17.1         | 2.02         | 4.51  | 0.65 |
| P4          | Slovenj Gradec     | 46.50779 | 15.07791  | summer | 2014 | Paleogene: Deposits                    | -5.7                                  | -22.7                                   | 5.7                                     | 4.4                                     | 7.91         | 11.6        | 7.29         | 2.48        | 7.86        | 27.2         | 13.0         | 35.5         | 2.23         | 3.55  | 0.33 |
| P4          | Slovenj Gradec     | 46.50779 | 15.07791  | winter | 2014 | Paleogene: Deposits                    | -7.2                                  | -21.7                                   | 5.8                                     | 4.7                                     | 8.03         | 10.4        | 7.01         | 2.66        | 7.95        | 27.2         | 10.9         | 17.1         | 2.00         | 4.02  | 0.61 |
| P5          | Mozirje            | 46.39326 | 14.95994  | summer | 2014 | Paleogene: Deposits                    | -4.2                                  | -25.5                                   | 6.7                                     |                                         |              |             |              |             |             |              |              |              |              |       |      |
